# Supplementary material
Source: PubMed Central journal article supplement (PMC8420026)
Supplement: 13321_2021_546_MOESM2_ESM.pdf [file 13321_2021_546_MOESM2_ESM.pdf]

# CAiSMD Feedback form

## How did you get to know about this workshop?

67 Responses- 3 Empty

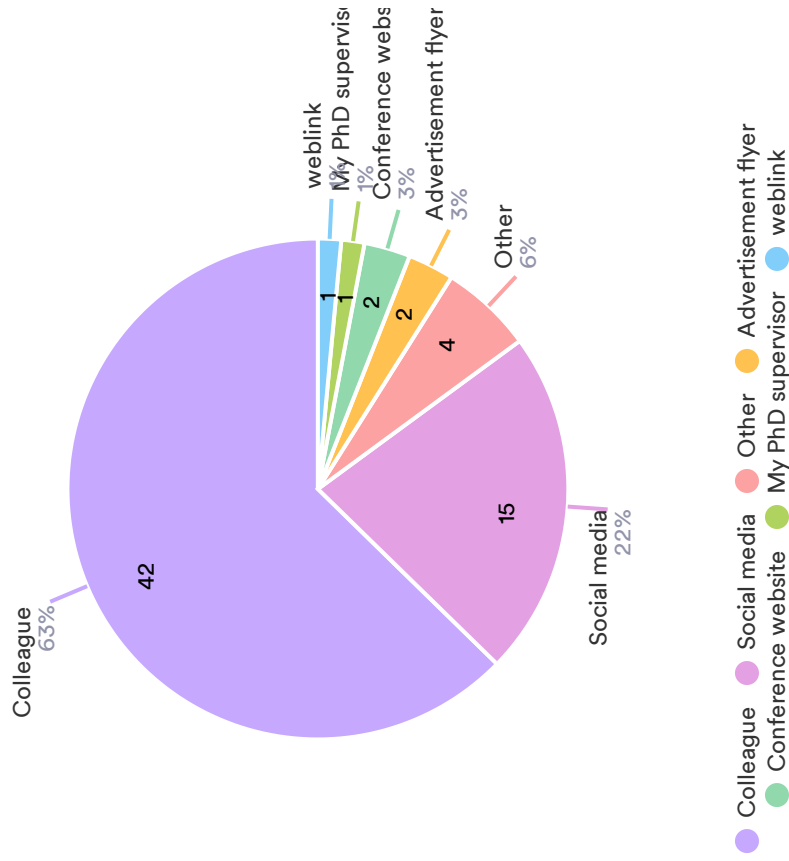

## Was it easy to register online?

69 Responses- 1 Empty

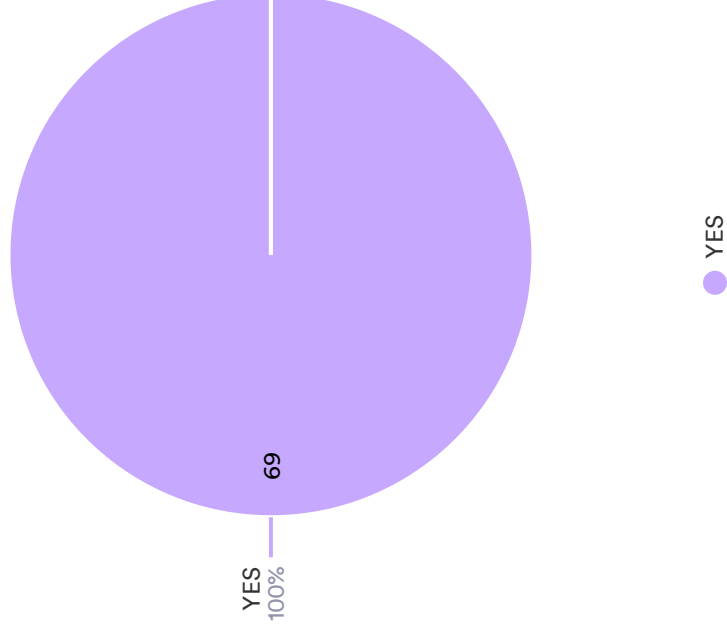

How did you find the speakers?

69 Responses- 1 Empty

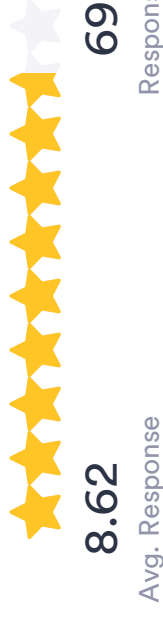

How did you find the contents of the workshop?

69 Responses- 1 Empty

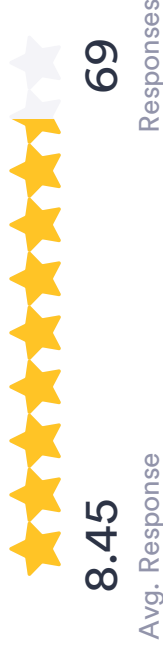

Did you find the zoom link easily available?

68 Responses- 2 Empty

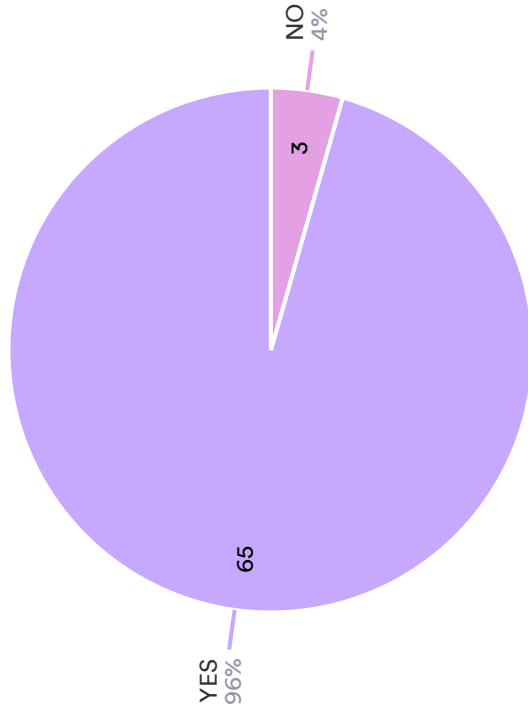

Which meeting tool you would have preferred?

3 Responses- 67 Empty

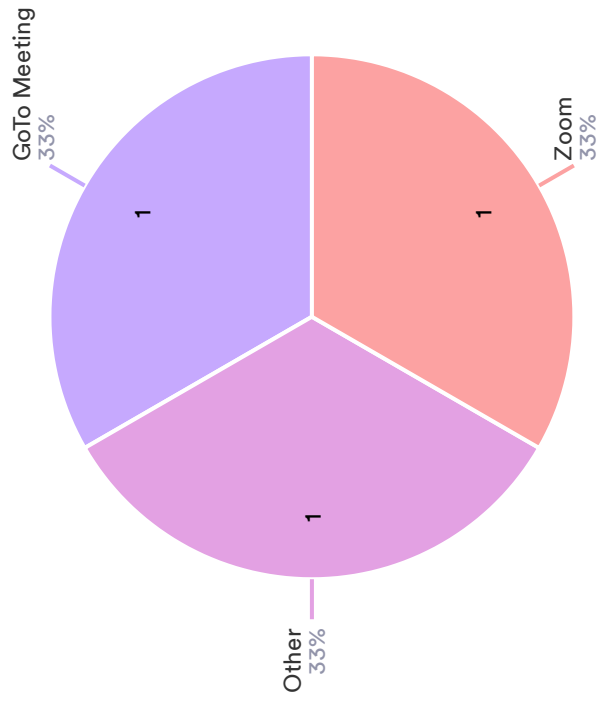

## Did you find the book of abstracts useful?

69 Responses- 1 Empty

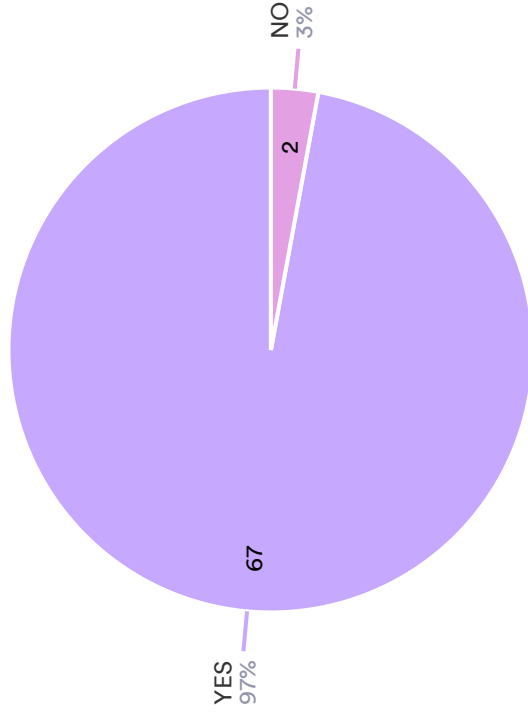

● YES ● NO

## What did you find most useful?

163 Responses- 1 Empty

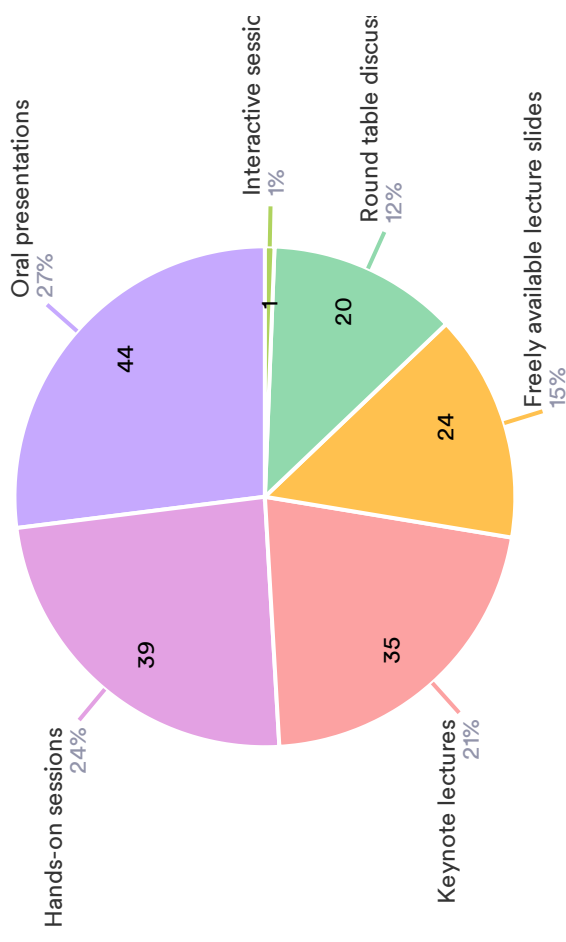

● Oral presentations ● Hands-on sessions ● Keynote lectures  
● Freely available lecture slides ● Round table discussion ● Interactive session

## How did you find the break periods?

69 Responses- 1 Empty

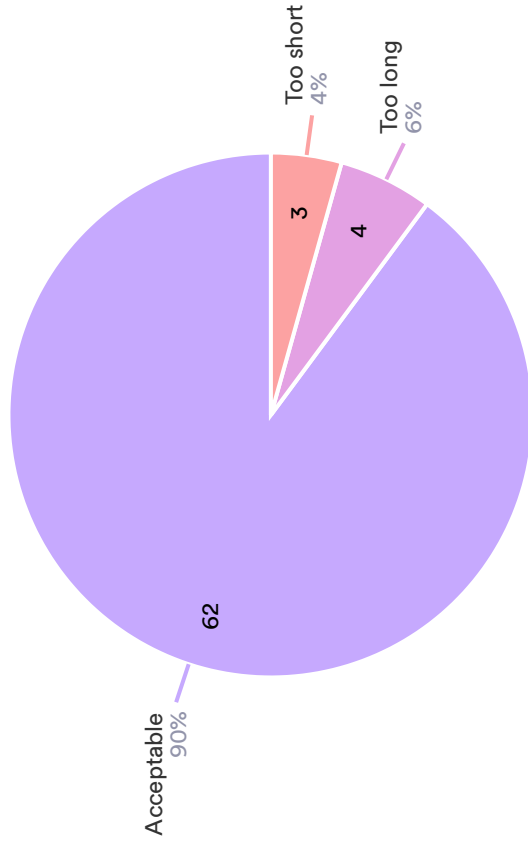

## How useful did you find this workshop?

68 Responses- 2 Empty

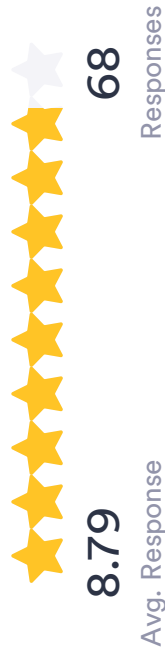

● Acceptable ● Too long ● Too short

Would you recommend this workshop to a colleague?

68 Responses- 2 Empty

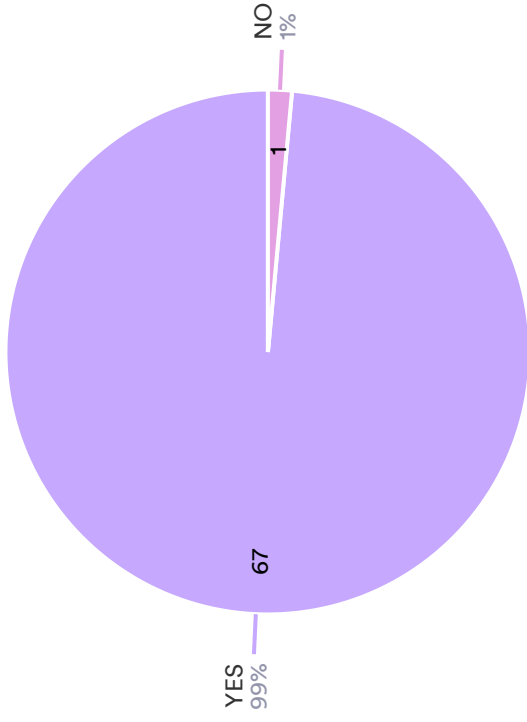

● YES ● NO

Was the timetable too tight to follow?

69 Responses- 1 Empty

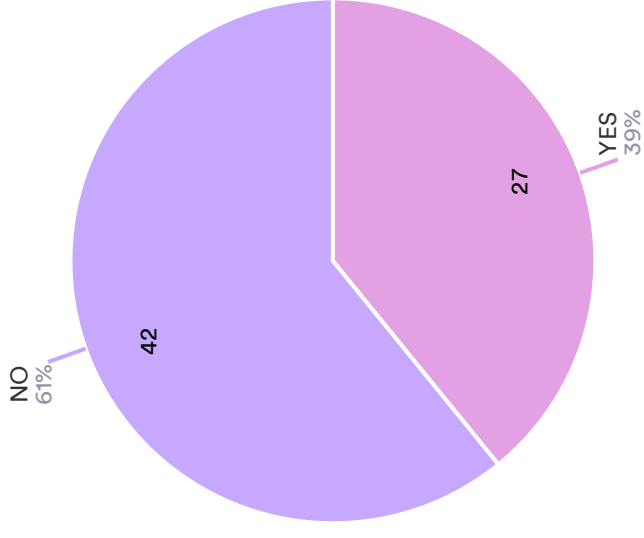

● NO ● YES

How easy was accessing website?

68 Responses- 2 Empty

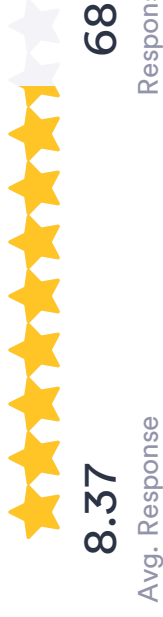

Did you find all information you want in website?

69 Responses- 1 Empty

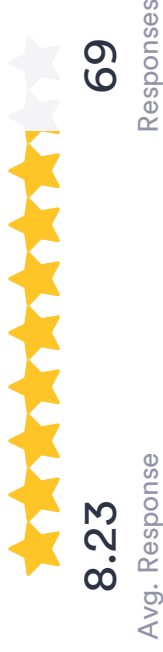



## Do you have any suggestions to improve the website?

38 Responses- 32 Empty

| Data                                                                                                                     | Responses |
|--------------------------------------------------------------------------------------------------------------------------|-----------|
| No                                                                                                                       | 5         |
| NA                                                                                                                       | 5         |
| No suggestions                                                                                                           | 1         |
| Sorry I don't have.                                                                                                      | 1         |
| No suggestion                                                                                                            | 1         |
| No, I do not.                                                                                                            | 1         |
| I believe there is still room for improvement but would like to get to you if I have any.                                | 1         |
| Not at all                                                                                                               | 1         |
| More resources on NP research should be uploaded and also profile of resource person should be made available for future | 1         |

## Do you have any other suggestions for improving the workshop?

44 Responses- 26 Empty

| Data                                                                                                                                                                                                                                                                                                                                                                                                                                                                                                               | Responses |
|--------------------------------------------------------------------------------------------------------------------------------------------------------------------------------------------------------------------------------------------------------------------------------------------------------------------------------------------------------------------------------------------------------------------------------------------------------------------------------------------------------------------|-----------|
| No                                                                                                                                                                                                                                                                                                                                                                                                                                                                                                                 | 6         |
| NA                                                                                                                                                                                                                                                                                                                                                                                                                                                                                                                 | 3         |
| None                                                                                                                                                                                                                                                                                                                                                                                                                                                                                                               | 2         |
| The organizers could give more time for the hands-on session                                                                                                                                                                                                                                                                                                                                                                                                                                                       | 1         |
| the zoom meeting links should be clearly marked out for each session at the different session                                                                                                                                                                                                                                                                                                                                                                                                                      | 1         |
| First of all thank you very much organizers for this workshop, congratulations !!! Basically, I have 2 suggestions; 1- More time for hands-on sessions because it gives more time for exchanges hence provides higher opportunities for learning. 2- Though difficult, I firmly think that a face to face workshop would be more appreciated. So bringing people together in one place for me is my second suggestion. This is because it is difficult to respect time with our different geographical time zones. | 1         |
